# Supplementary material
Source: ML conference proceedings conference paper supplement (https://proceedings.neurips.cc/paper_files/paper/2022/hash/a781ff9cfb267277937db1818284739f-Abstract.html)
Supplement: Supplementary file 1 [file a781ff9cfb267277937db1818284739f-Supplemental-Conference.zip]

Archive with 1 entries (1 files):
- Chromatic_Correlation_Clustering__Revisited_Appendix.pdf
